# Supplementary material for: Effects of Local and Systemic Immune Challenges on the Expression of Selected Salivary Genes in the Malaria Mosquito Anopheles coluzzii
Source: MDPI journal article supplement (doi:10.3390/pathogens10101300), 2021-10-09
Supplement: s1 [file s1]

Figure S5: injection assay: candidate transcriptional modulation between 5 and 24 h post challenge.

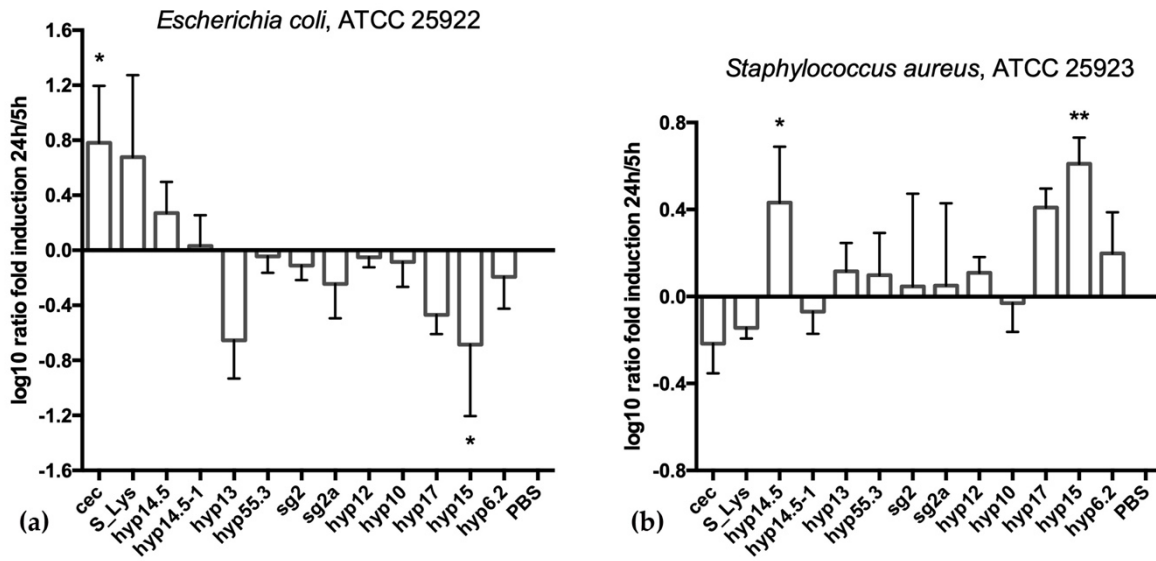

Figure S5: Injection assay: (a) log<sub>10</sub> of fold induction (EC-treated/PBS-treated mosquitoes) of each candidate between 5 and 24 h after challenge; (b) log<sub>10</sub> of fold induction (SA-treated/PBS-treated mosquitoes) of each candidate between 5 and 24 h after challenge. \*:  $p < 0.05$ ; \*\*:  $p < 0.01$ .
