# Supplementary material for: Effects of Local and Systemic Immune Challenges on the Expression of Selected Salivary Genes in the Malaria Mosquito Anopheles coluzzii
Source: MDPI journal article supplement (doi:10.3390/pathogens10101300), 2021-10-09
Supplement: s1 [file s1]

Figure S2: hyp10 and hyp12

(a)

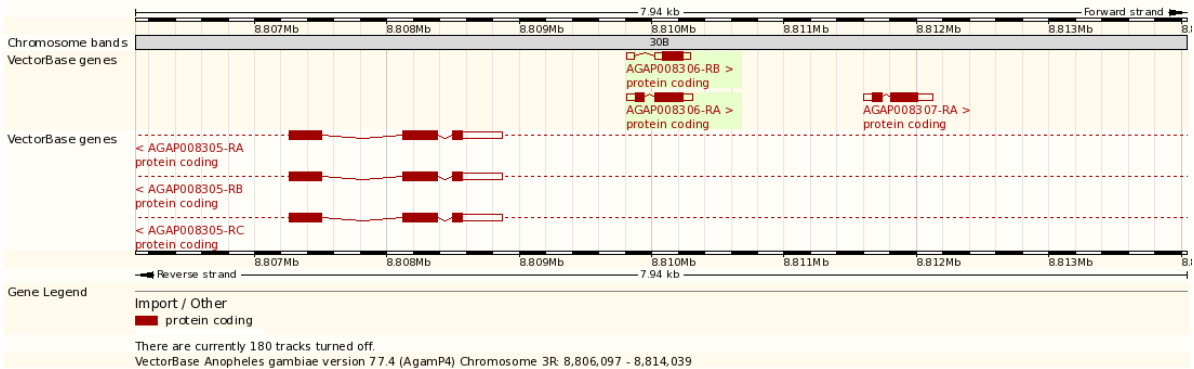

(b)

hyp10

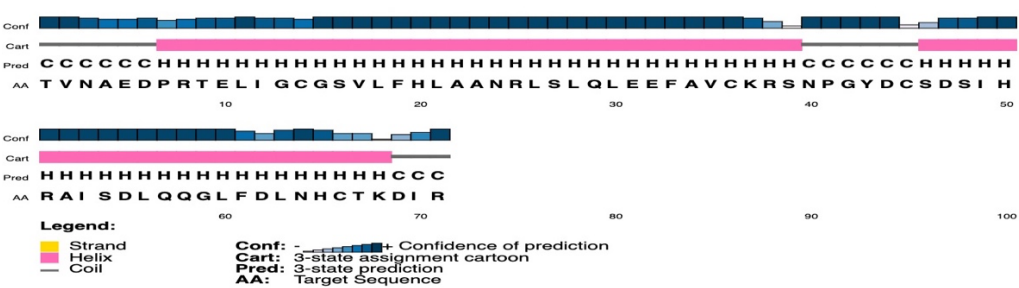

hyp12

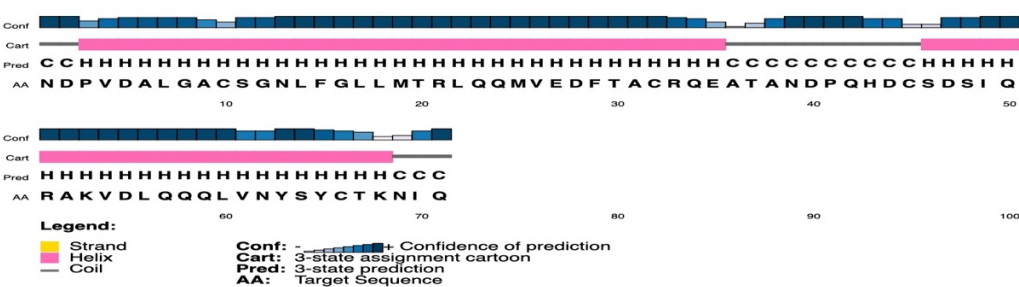

(c)

Sequence alignment

|       |    |                                                    |    |
|-------|----|----------------------------------------------------|----|
| hyp12 | 1  | MRFCVALIGLLC--SVQSVTANDPVDALGACSGNLFGLLMTRLQQMVE   | 48 |
| hyp10 | 1  | MRFLTVLTVGLLVWGVFATVNAEDPRTTELIGCGSVLFHLAANRLSLQLE | 50 |
| hyp12 | 49 | DFTACRQEATANDPQHDCSDSIQRAKVDLQQQLVNYSYCTKNIQ       | 92 |
| hyp10 | 51 | EFAVCKR---SNPGYDCSDSIHRAISDLQQGLFDLNHCTKDIR        | 90 |

(d)

|       |                          |           |         |
|-------|--------------------------|-----------|---------|
|       | Most frequent aminoacids |           |         |
| hyp10 | 14.4% Leu                | 8.9% Val  |         |
| hyp12 | 12% Leu                  | 10.9% Gln | 8.7 Ala |

Figure S2: hyp10 (AGAP008306)/hyp12 (AGAP008307) gene cluster. (a): scheme of the genomic region (chromosome 3R) where hyp10 and hyp12 are placed and separated by a short region of 1.2 kbp. (b): PSIPRED secondary structure prediction: the cartoons summarize the predictions of secondary structures of mature peptides (without SP) as calculated by PSIPRED on-line tool for hyp10 and hyp12. Structures with two helices (and 4 cysteines) are predicted. (c): sequence alignment of hyp10 and hyp12: cysteines are conserved. (d): table summarizing the most frequent aminoacids in the two candidates: both candidates present a high content of leucine.
