# Supplementary material for: Effects of Local and Systemic Immune Challenges on the Expression of Selected Salivary Genes in the Malaria Mosquito Anopheles coluzzii
Source: MDPI journal article supplement (doi:10.3390/pathogens10101300), 2021-10-09
Supplement: s1 [file s1]

## Dataset S1: FASTA sequences

### FULL LENGTH FASTA SEQUENCES

aminoacid sequences downloaded from VectorBase: <https://vectorbase.org/vectorbase/app>

In yellow: predicted Signal Peptides according to SignalP Server:

<http://www.cbs.dtu.dk/services/SignalP/>

In light blue: predicted pro-peptides according to ProP 1.0 and Spider P (mature peptides are listed in red):

<http://www.cbs.dtu.dk/services/ProP/>,

<http://www.arachnoserver.org/spiderP.html>

```
>hyp6.2 AGAP006495
MGRVMCLRLRLMSTLLVVLIVGKKTNAAPQVTEAPGNVGSTYSPMADIGRLATGATKLFQFWNTGTRFGTELSRRTFDF
LRVKK
>hyp17 AGAP000151
MKLYSGYRLLVLLVMTVCCLLLFIAPTGAADPLPGQTQRTLGYRGNDKRATPPMHSLSGSGARMAMTGGGILGGIFSAL
>hyp15 AGAP000152
MKFYSVGKLVKVLVMVAVCCLLLCTAPTGAADPLPGRDRNTIANKSKDKKASAPKHSLSGTGARMALTGGGVLGGLVTNM
>hyp12 AGAP008306
MRFCCVALIGLLCSVQSVTAANDPVDALGACSGNLFGLLMTRLQQMVEDFTACRQEATANDPQHDCSDSIQRAKVDLQQQ
LVNYSYCTKNIQ
>hyp10 AGAP008307
MRFLTTLTVGLLVWVGVFATVNAEDPRTELIGCGSVLFHLAANRLSLQLEEFVAVCKRSNPGYDCSDSIHRAISDLQQGLF
DLNHCTKDIR
>sg2a AGAP006504
MKLFLTLTLTSLVVMVFAALPAHHHSRGGDGSSANSTGQSYNNSGSPNNSAGVPDFGFNSQSNVPGFGNGQQPGQQQQQQQ
GQGFPPFGQSGFSGFSGNRQPFQGNQQGQDGNQQQGRGIPFFGQGGGQGGIPSGSGQQNGGIPSLGNGQAQSGFSPF
GNGQQGGNFPFFG
>sg2 AGAP006506
MKSILVTFATLSVALVVVAIPTSFNYGGGGGYFINGTGQSFNFSGESNGTSIPGVPDFGSFLPNLGNLTQQFGSSGAF
PQFSIPSWTNFTDAFSSIFPFFGNVQGGGFPPFG
>hyp55.3 AGAP005822
MKYRFALLTVLVAVVPRPSAALLPDFAVPARMTGVASGLDSSGNVVQNTARVLHLLDQFQSITESLYGLQTPPLYRLATG
LRVVLDSLVESGSPIFQGLSNAARLSTGNITTVFDGIRRSINGTIALHELHQSALNGTVLLLGTGGVHNISTVLHQLVRN
VANLTGALDEIEPAIVAIQEQLSRPTQAQVDGRYPRAAIRRLNGILLDYVNIGQATVPQINAVVNRIRMMDGFIGRLAA
VTGGLWSDLNRTLAAVNGSVYAGVQQLHTTARTIRNSFNATVLGTARKLKLFFLDDEELQLVARNASALLVKRLTNVT
GALDGLVNRTEVRLEGYSELVLNRTIAAVTDLAWRLALSVTSSVPGADICYARYNYEFDKIPRLIYGLVACGQGEART
LQSVGGGLSGALSLTQAQLDAETSNEYEQCLGGLVPGSSDVLKRQRIVCLRGAERFSGVLGDAVVDAQLSAFQALLQKELS
YSAERHRQCVRITSGHLMVAEVKRLWSSIANCLS
>hyp14.5 AGAP004883
MLCSRSTLYAVFAFIFVSVLHDAMALQCRNCLSSKSFAECEKMGEVVCNSTIVNQNHQAFLPDNPTLPQGNWTEFKCY
QLQVARLHQNNNTDSGLRGYARGCTFLHVNFCNGWTSTLNLTSCTSTSDNCEQHLPTVAPELTTTTTTTKPSSNGANVLT
WRNLSSLGCLSAVVLLLAAR
>hyp14.5-1 AGAP001174
MKLFLLSVFFFLASFAAQAALRCMQGTEIVLPSSDAEKDKDKVPEFTECSILTTGASAASLLVLKPNTATLPSTDYKCY
HLRIEESKATIVKGCYKAQNVCDGKFKVDTVREVFCSCDQDECNSAHRFASNWKILSLTLFTILCLFMK
>hyp13 AGAP003474
MKNVFFALLLVVLVCCLVSVQGENEIQNVVKRSIPLRQLILQHNAALDDSDSDSGSQ
>LysC1 AGAP007347
MKVFSTVLLAIVACCAVAEAKTFTGKCELAKALANNGIAKASLPDWVCLVQNESAFSTSATNKNKNGSTDYGFQINNKYW
CDSGYGSNDCKIACKNLLNDDITDDIKCAKLIHCRHGFNAWYGWKNHCNGKKLPNVSSCF
>Cec AGAP000693
MNFSKIIFVVLAVLLCSQTEAGRLKKLGKKIEGAGKRVFKAAEKALPVVAGVKALG
```

## PRECURSORS WITHOUT SP

>hyp6.2\_AGAP006495  
APQVTEAPGNVGSTYSMPADIGRLATGATKLFGQFWNTGTRFGTELSRRTFDFLRVKK  
>hyp17\_AGAP000151  
DPLPGQTQRTLGYRGNDKRATPPMHSLGSGARMAMTGGGILGGIFSAL  
>hyp15\_AGAP000152  
DPLPGRDRNTIANKSKDKKASAPKHS�GTGARMALTGGGVLGGVLTNM  
>hyp12\_AGAP008306  
NDPVDALGACSGNLFGLLMTRLQQMVEDFTACRQEATANDPQHDCSDSIQRAKVDLQQQLVNYSYCTKNIQ  
>hyp10\_AGAP008307  
TVNAEDPRTELIGCGSVLFHLLAANRLSLQLEEFVCKRSNPGYDCSDSIHRAISDLQQGLFDLNHCTKDIR  
>sg2a\_AGAP006504  
LPAHHHSRGGDGSSANSTGQSYNNSGSPNNSAGVPDFGFNSQSNVPGFGNGQQPGQQQQGQGQGFPPFFGQGQSGFPSFG  
NRQPFFGQNQQGQDNGNQQGRGIPFFGQGGGQGGIPSGSGQQNGGIPSLGNGQAQSGFPSFGNGQQGGNFPFFG  
>sg2\_AGAP006506  
IPTSFNYGGGGGYFINGTGQSFNFSGESNGTSIPGVPDFGSFLPNLGNLTQQFGSSGAFPPQFSIPSWTNFTDAFSSIFP  
FFGNVQGGGFPPFFG  
>hyp55.3\_AGAP005822  
LPDFAVPARMTGVASGSLDSSGNVVQNTARVLHLLDQFQSITESLYGLQTPTLYRLATGLRVVLDLSDVESGSPIFQGLSN  
AARLSTGNITTVFDGIRRSINGTIALHELHQALNGTVLLLTGGVHNISTVLHQLVRNVANLTGALDEIEPAIVAIQEQ  
ELSRPTQAQVDGRYPRAAIRRLNGILLDYVNIGQATVPQINAVVNRIRMMDGFIGRLAAVTGGLWSDLNRTLAAVNGSVY  
AGVQQRLHTTARTIRNSFNATVLGTARKLKLFFLDLLEELQLVARNASALLVKRLTNVTGALDGLVNRTEVRLEGYSEL  
VLNRTIAAVTDLAWRLALSVTSSVPGADICYARYNYEFDKIPRLIYGS�VACGQGEARTLQSVGGGLSGALSLTQAQLDA  
ETSNYEQCLGGLVPGSSDVLKRQIRIVCLRGAERFSGVLGDAVVDALSAFQALLQKELSYSAERHRQCVRTSGHLMVAEV  
KRLWSSIANCLS  
>hyp14.5\_AGAP004883  
LQCRNCLSSKSFAECEKMGEVVVCNSTIVNQNHQAFLPDNP TL PQGNWTEFKCYQLQVARLHQNN TDSGLRGYARGCTFL  
HVNFCNGWTSTLNL TSCSTCTSDNCEQHLP TVAPEL TTTTTTKKPSSNGANVLTWRNLSSLGCLSAVVL LLAAR  
>hyp14.5-1\_AGAP001174  
LRCMQGTEIVLP SDDSAEKDKDKVPEFTECSILTTGASAASLLVLKPNTATLPSTDYKCYHLRIEESSESKKATIVKGC IY  
KAQNVCDGKFKVDTVREVFCSQCDQDECNSAHRFASNWKILSLTLFTILCLFMK  
>hyp13\_AGAP003474  
NEIIQN VVKRSIPLRQLILQHNALDDSDSDSGSQ  
>LysC1\_AGAP007347  
KTFGKCELAKALANNGIAKASLPDWVCLVQNESAFSTSATNKNKNGSTDYGIFQINN KYWCDSGYGSNDCKIACKNLLND  
DITDDIKCAKLIHKRHGFNAWYGWKNHCNGKKLPNVSSCF  
>Cec\_AGAP000693  
GRLKKLGKKIEGAGKRVFKAAEKALPVVAGVKALG

## MATURE PEPTIDES

>hyp6.2\_AGAP006495  
LATGATKLFQGFWNTGTRFGTELSRRTFDFLRVKK  
>hyp17\_AGAP000151  
DPLPGQTQRTLGYRGNDKRATPPMHSLGSGARMAMTGGGILGGIFSA  
>hyp15\_AGAP000152  
DPLPGRDRNTIANKSKDKKASAPKHS�GTGARMALTGGGVLLGGVLTNM  
>hyp12\_AGAP008306  
NDPVDALGACSGNLFGLLMTRLQQMVEDFTACRQEATANDPQHDCSDSIQRAKVDLQQQLVNYSYCTKNIQ  
>hyp10\_AGAP008307  
TELI GCGSVLFHLLAANRLSLQLEEFVCKRSNPGYDCSDSIHRAISDLQQGLFDLNHCTKDIR  
>sg2a\_AGAP006504  
GIPFFGQGGGQGGIPSGSGQQNGGIPSLGNGQAQSGFPSPFGNGQQGNFPFFG  
>sg2\_AGAP006506  
IPTSFNYGGGGYFINGTGQSFNFSGESNGTSIPGVPDFGSFLPNLGNLTQQFGSSGAFPPQFSIPSWTNFTDAFSSIFP  
FFGNVQGGGFPPFFG  
>hyp55.3\_AGAP005822  
LAAVTGGLWSDLNRTLAAVNGSVYAGVQQRLHTTARTIRNSFNATVLGTARKLKLFFLDDLEELQLVARNASALLVKRLT  
NVTGALDGLVNRTEVRLEGYESELVLRNTIAAVTDLAWRLALSVTSSVPGADICYARYNYEFDKIPRLIYGSILVACGQGE  
ARTLQSVGGGLSGALSILTQAQLDAETSNYEQCLGGLVPGSSDVLKRQRIVCLRGAERFSGVLGDAVVDAQLSAFQALLQK  
ELSYSAERHRQCVRTSGHLMVAEVKRLWSSIANCLS  
>hyp14.5\_AGAP004883  
LQCRNCLSSKSFAECEKMGEVVVCNSTIVNQNHQAFLPDNPTLPQGNWTEFKCYQLQVARLHQNNNTDSGLRGYARGCTFL  
HVNFCNGWTSTLNLTSCTCTSDNCEQHLPTVAPELTTTTTTKKPSSNGANVLTWRNLSSLGCLS AVVLLLAAR  
>hyp14.5-1\_AGAP001174  
LRCMQGTEIVLPSDDSAEKDKDVPEFTECSILTTGASAASSLVLKPNTATLPSTDYKCYHLRIEESSESKKATIVKGCY  
KAQNVCDGKFKVDTVREVFCSCDQDECNSAHRFASNWKILSLTLFTILCLFMK  
>hyp13\_AGAP003474  
QLILQHNLDDSDSDSGSQ  
>LysC1\_AGAP007347  
KTFGKCELA KALANNGIAKASLPDWVCLVQNESAFSTSATNKNKNGSTDYGFQINNKYWCDSGYGSNDCKIACKNLLND  
DITDDIKCAKLIHKRHGFNAWYGWKNHCNGKKLPNVSSCF  
>Cec\_AGAP000693  
GRLKKLGKKIEGAGKRVFKAAEKALPVVAGVKALG
