# Supplementary material for: Effects of Local and Systemic Immune Challenges on the Expression of Selected Salivary Genes in the Malaria Mosquito Anopheles coluzzii
Source: MDPI journal article supplement (doi:10.3390/pathogens10101300), 2021-10-09
Supplement: s1 [file s1]

Figure S4: feeding assay: comparison of replicates.

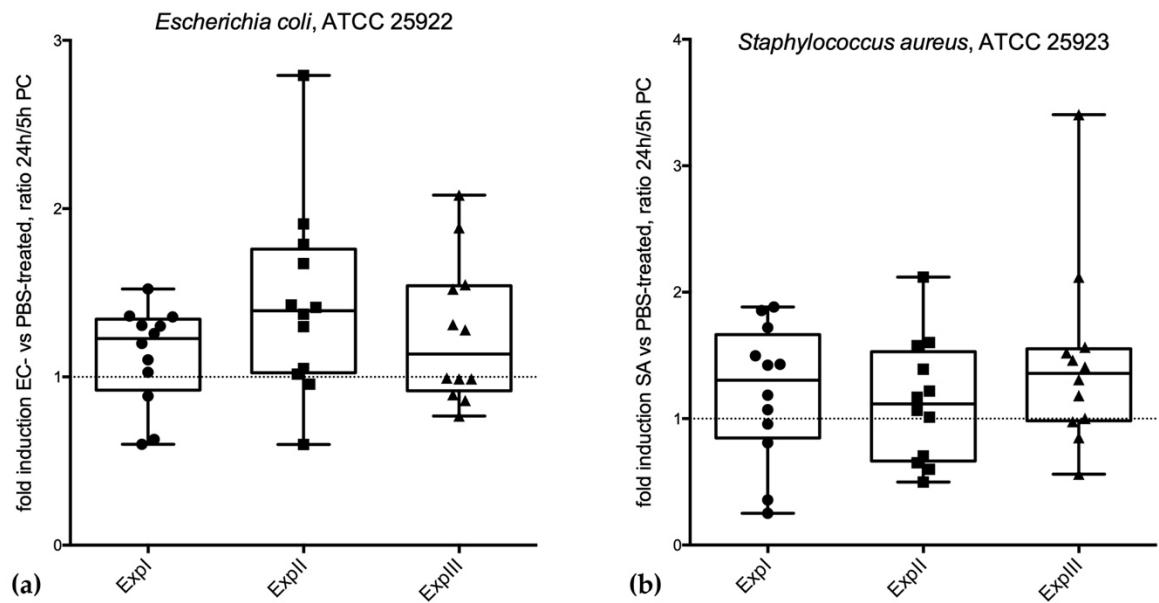

Figure S4: Feeding assay: (a) ratios of fold induction (EC-treated/PBS-treated mosquitoes) of each candidate between 5 and 24 h after challenge, in each biological replicate; (b) ratios of fold induction (SA-treated/PBS-treated mosquitoes) of each candidate between 5 and 24 h after challenge, in each biological replicate.
